# Supplementary material for: Overexpression of a Metallothionein 2A Gene from Date Palm Confers Abiotic Stress Tolerance to Yeast and Arabidopsis thaliana
Source: PubMed Central journal article supplement (PMC6627811; doi:10.3390/ijms20122871), 2019-06-12
Supplement: ijms-20-02871-s001.pdf [file ijms-20-02871-s001.pdf]

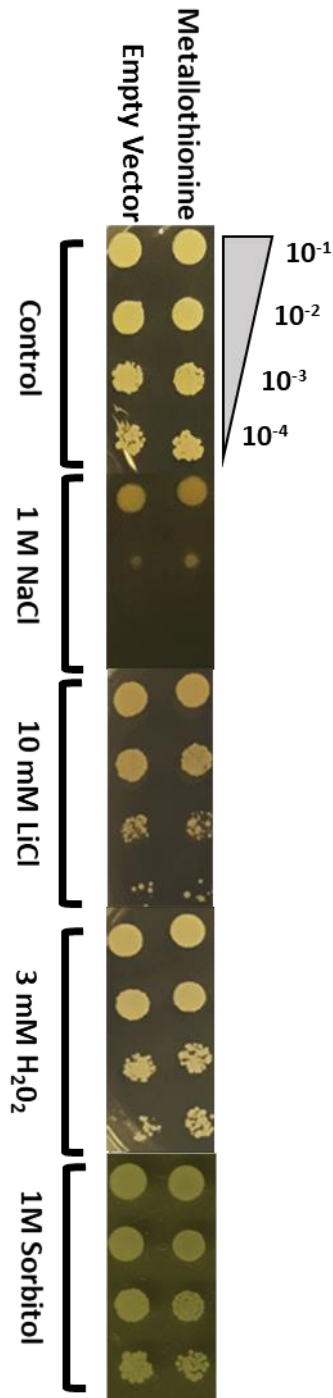

**Supplementary Figure S1.** Overexpression of *PdMT2A* in INVSc wild type yeast strain. The effect of *PdMT2A* transgene on the growth of wild type yeast cells, the relative tolerance of TY and EV cells tested by yeast spot assay when grown under control and other different abiotic stress conditions on solid media

Supplementary Table S1. List of oligos used for qPCR analysis.

| Genes                                                   | Primers                 |
|---------------------------------------------------------|-------------------------|
| AtCHX20-F                                               | TGCGCGTATTTTAGCAGAGC    |
| AtCHX20-R                                               | ATCGTTAAAAGCGGCTGCAG    |
| AtSOS1-F                                                | TCGTTTCAGCCAAATCAGAAAGT |
| AtSOS1-R                                                | CGCATGTTTACGGGTTTCAA    |
| AtHKT1-F                                                | CAATCACCGAAAGGCAAAAT    |
| AtHKT1-R                                                | CGTCCTGCAAACCCATAACT    |
| AtVacuolar Na <sup>+</sup> /H <sup>+</sup> Antiporter-F | ATTGAGCCTTCAGGGAACCA    |
| AtVacuolar Na <sup>+</sup> /H <sup>+</sup> Antiporter-R | CCGTGTCAAGAAGCCACGTATA  |
| AtABA stress induced gene - F                           | GCTGGGCCTATCGTGATGTT    |
| AtABA stress induced gene - R                           | TCCAATACGCAAGCCACTGTT   |
| AtSOD-F                                                 | TGCCACCTTACAATCACTG     |
| AtSOD-R                                                 | TCTGCATGGACAACAACAGC    |
| AtActin2-F                                              | TCCCTCAGCACATTCCAGCAGAT |
| AtActin2-R                                              | AACGATTCTGGACCTGCCTCATC |
